# Supplementary material
Source: PubMed Central journal article supplement (PMC6407419)

*Scx-Cre:Acvr1<sup>[R206H]FlEx/+</sup>*

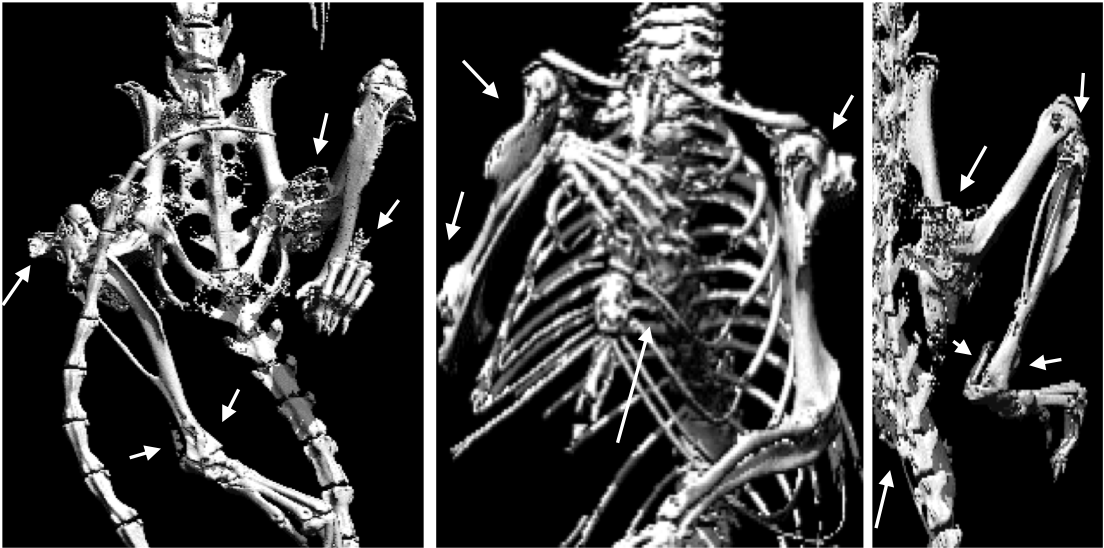

*Scx-Cre:ACVR1<sup>Q207D</sup>-Tg*

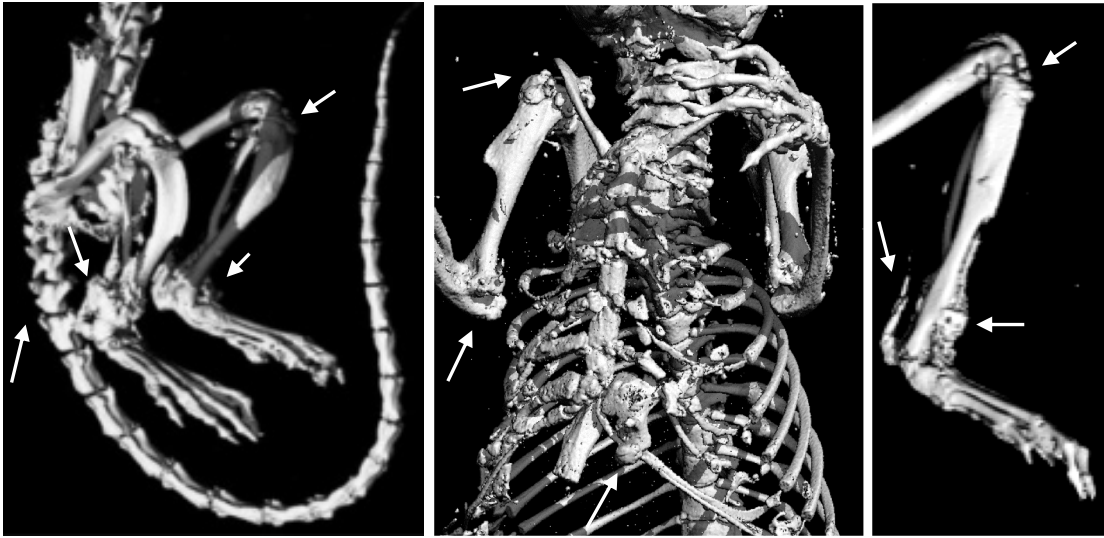

*Scx-Cre*

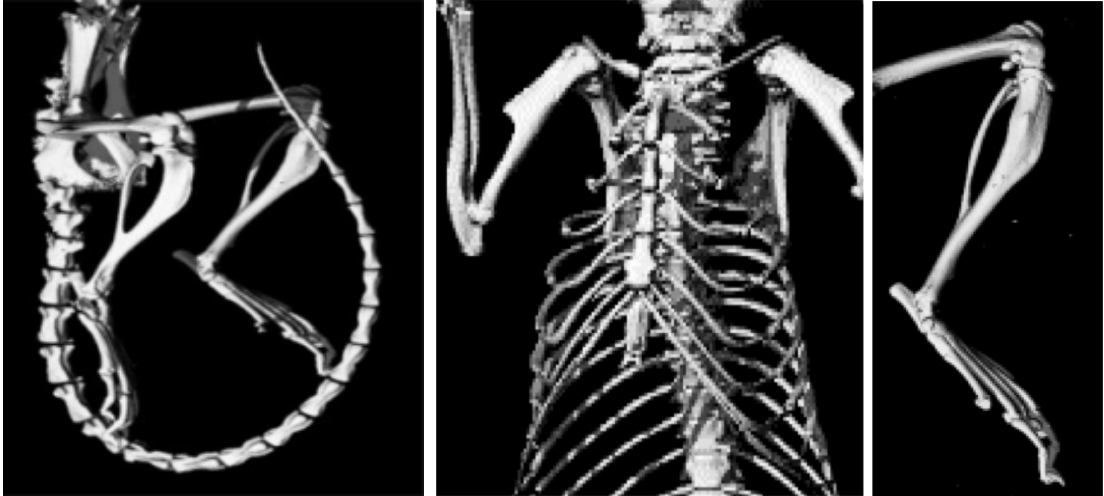

Supplemental Figure 2

*Scx-Cre:Acvr1<sup>[R206H]FlEx/+</sup>*

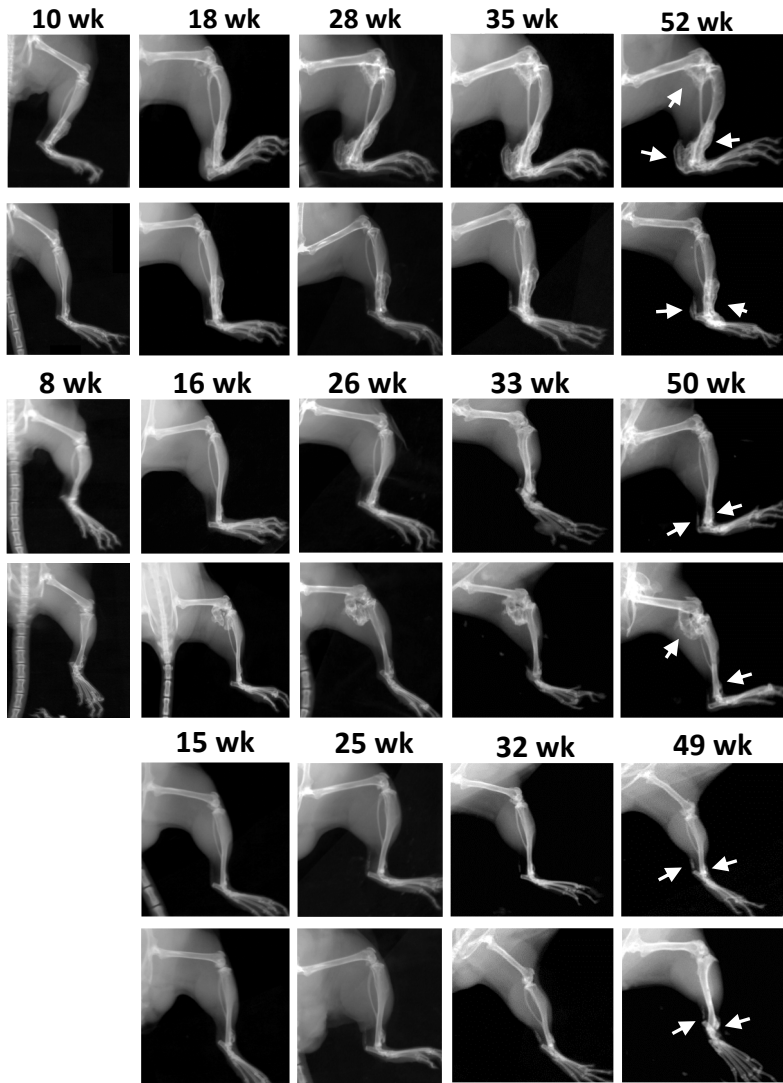

| <i>Scx-Cre:Acvr1<sup>[R206H]FlEx/+</sup></i><br>penetrance | 18 weeks   | 28 weeks   | 35 weeks    | 52 weeks   |
|------------------------------------------------------------|------------|------------|-------------|------------|
| retropopliteal fossa                                       | 17% (3/18) | 17% (3/18) | 22% (4/18)  | 33% (2/6)  |
| tibialis ligament                                          | 28% (5/18) | 39% (7/18) | 72% (13/18) | 100% (6/6) |
| Achilles tendon                                            | 11% (2/18) | 33% (6/18) | 67% (12/18) | 83% (5/6)  |

*Scx-Cre:ACVR1<sup>Q207D</sup>-Tg*

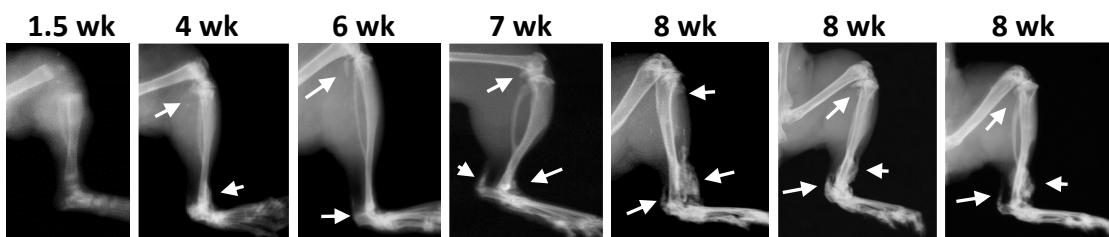



**Skeletal muscle interstitial**

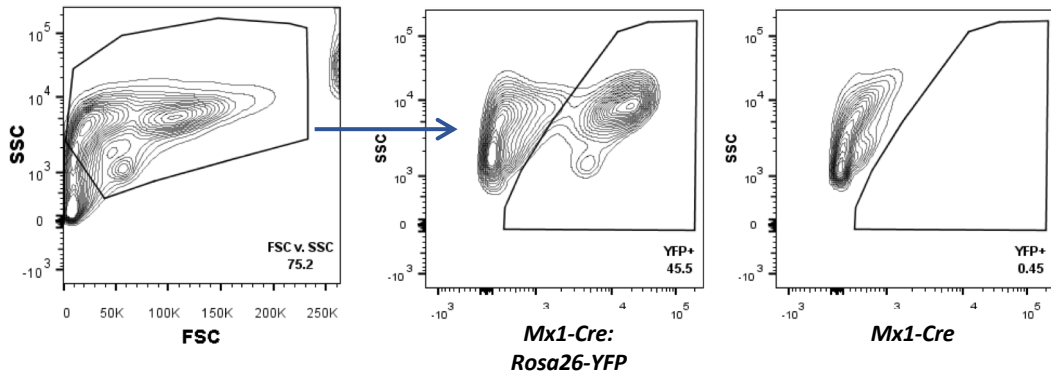

**Bone marrow**

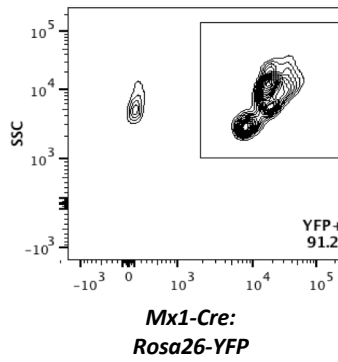

Supplemental Figure 5

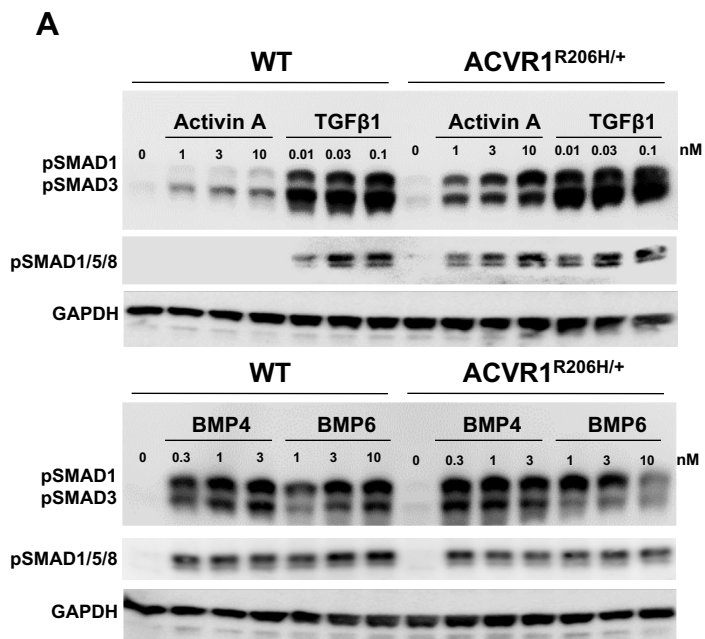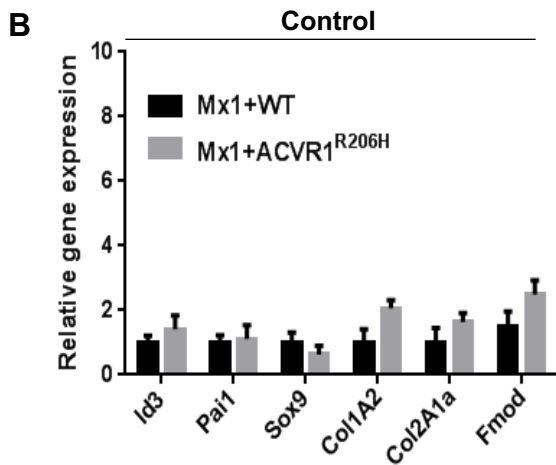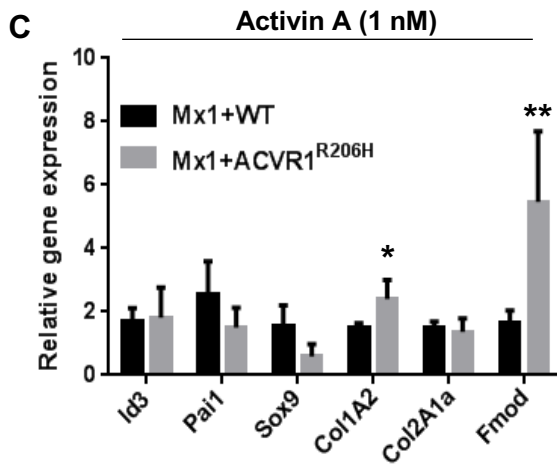

Supplemental Figure 6

*Scx-Cre:Rosa26-YFP*

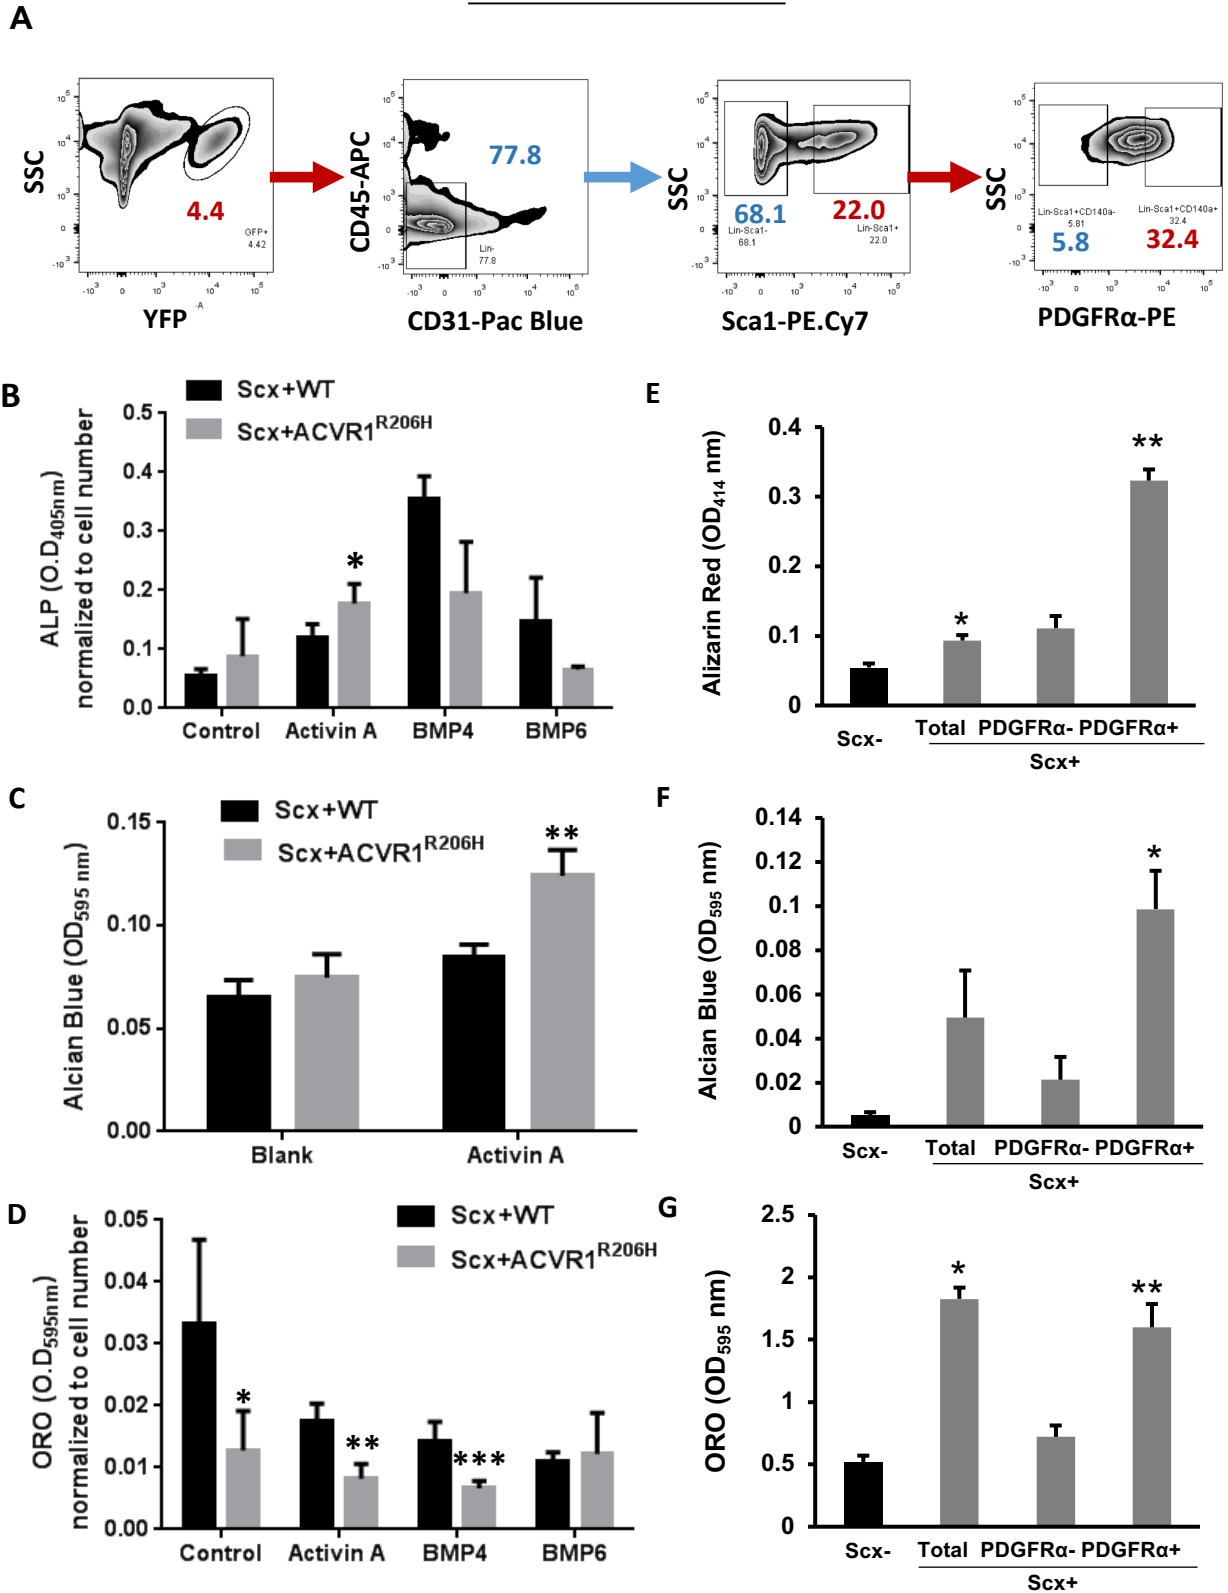

Supplementary figure 7

*Mx1-Cre:Rosa26-YFP*

A

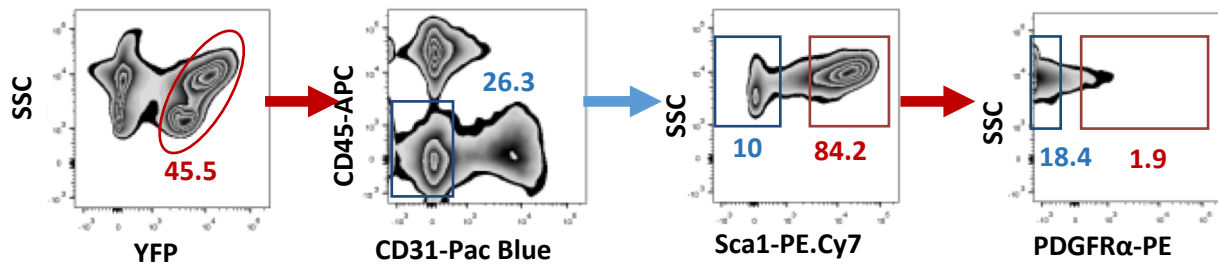

B

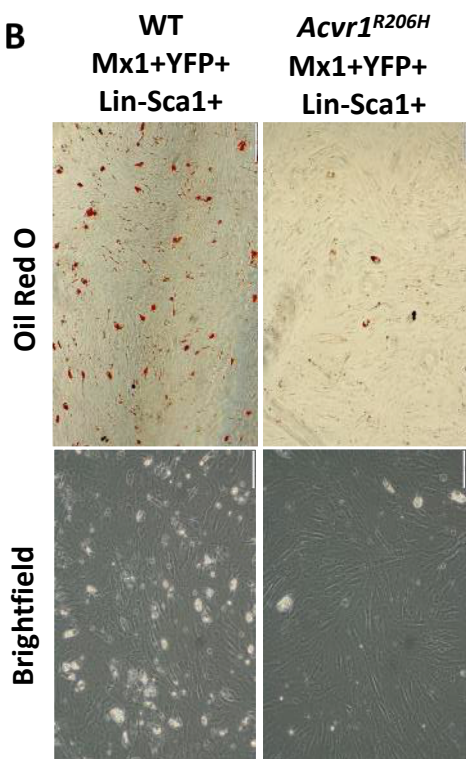

C

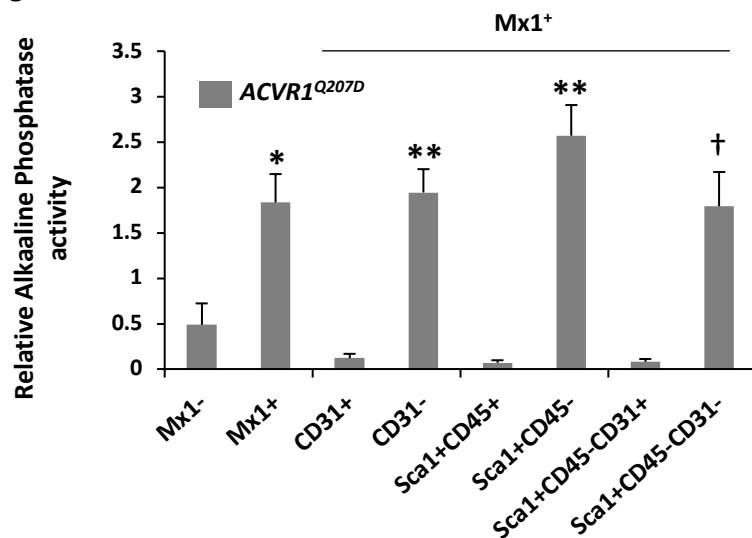

D

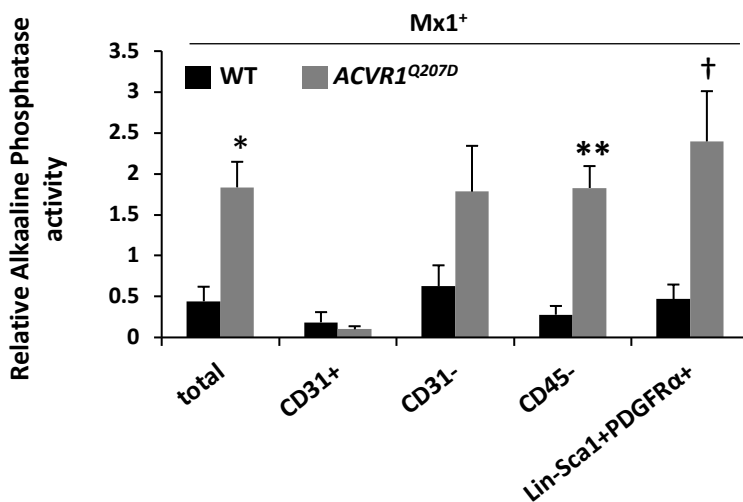

Supplement: NIHMS916412-supplement-Supplement.pdf [file NIHMS916412-supplement-Supplement.pdf]
