# Supplementary material
Source: PubMed Central journal article supplement (PMC6407419)
Supplement: NIHMS916412-supplement-Supplemental_Table_S1.pdf [file NIHMS916412-supplement-Supplemental_Table_S1.pdf]

**Supplementary Table 1: qPCR primer sequences**

| <b>Gene</b>                                | <b>Primer sequence</b>                                                                 |
|--------------------------------------------|----------------------------------------------------------------------------------------|
| 18S                                        | Forward: 5'- CGGCTACCACATCCAAGGAA -3'<br>Reverse: 5'- GCTGGAATTACCGCGGCT -3'           |
| Id1                                        | Forward: 5'- CCTAGCTGTTCGCTGAAGGC -3'<br>Reverse: 5'- GTAGAGCAGGACGTTACCT -3'          |
| ALK2                                       | Forward: 5'-GTGGAAGATTACAAGCCACCA -3'<br>Reverse: 5'-GGGTCTGAGAACCATCTGTTAGG -3'       |
| Sox9                                       | Forward: 5'-TCAGATGCAGTGAGGAGCAC-3'<br>Reverse: 5'-CCAGCCACAGCAGTGAGTAA-3'             |
| Pai1                                       | Forward: 5'- ACAGCCAACAAGAGCCAATC -3'<br>Reverse: 5'- TTTCCCAGAGACCAGAACCA -3'         |
| Runx2                                      | Forward: 5'-GCAGTTCCCAAGCATTTTCAT-3'<br>Reverse: 5'-CACTCTGGCTTTGGGAAGAG-3'            |
| Osterix                                    | Forward: 5'- TATGCTCCGACCTCCTCAACT -3'<br>Reverse: 5'- TCCTATTTGCCGTTTTCCCGA -3'       |
| Scleraxis                                  | Forward: 5'-AACACGGCCTTCACTGC-3'<br>Reverse: 5'-CTTCGAATCGCCGTCTT-3'                   |
| Collagen 1A2                               | Forward: 5'- GTAACTTCGTGCCTAGCAACA -3'<br>Reverse: 5'- CCTTTGTCAGAATACTGAGCAGC -3'     |
| Collagen 2A1                               | Forward: 5'-AAAGGACAGACGGGCGAACC-3'<br>Reverse: 5'-GCTCTCCGGGACGGCCAGGGT-3'            |
| Osteopontin                                | Forward: 5'- AGCAAGAAACTCTTCCAAGCAA -3'<br>Reverse: 5'- GTGAGATTCGTCAGATTCATCCG -3'    |
| Fibromodulin                               | Forward: 5'-GAAGGGTTGTTACGCAAATGG-3'<br>Reverse: 5'-AGATCACCCCCTAGTCTGGGTTA-3'         |
| Biglycan                                   | Forward: 5'-CCTTCCGCTGCGTACTGA-3'<br>Reverse: 5'-GCAACCACTGCCTCTACTTCTTATAA-3'         |
| Bone Specific Protein (BSP)                | Forward: 5'- AAGCAGCACCGTTGAGTATGGG -3'<br>Reverse: 5'- ACCCTCGTAGCCTTCATAGCCA -3'     |
| Cartilage Oligomeric Matrix Protein (COMP) | Forward: 5'-CGCAGCTGCAAGACGTGAGAGAGCTGT-3'<br>Reverse: 5'-CCGAATTCGCTGGTCTGGGTTTCGA-3' |
| PPAR $\gamma$                              | Forward: 5'-TTTTCAAGGGTGCCAGTTTC-3'<br>Reverse: 5'-AATCCTTGGCCCTCTGAGAT-3'             |
